# Supplementary material for: Phase and rheological behavior of a gemini cationic surfactant aqueous system
Source: Royal Society of Chemistry journal article supplement (doi:10.1039/c2sm26346g), 2012-01-01
Supplement: c2sm26346g.pdf [file c2sm26346g.pdf]

## Supplementary Information

# Phase and Rheological Behavior of a Gemini Cationic Surfactant Aqueous System

Xi-Lian Wei, <sup>\*a</sup> Xiu-Hong Wang, <sup>a</sup> De-Zhi Sun, <sup>a</sup> Ji-Feng Liu, <sup>a</sup> Jie Liu, <sup>a</sup> Yu-Hong Sha, <sup>a</sup> Zhong-Ni Wang, <sup>\*b</sup>

<sup>a</sup> College of Chemistry and Chemical Engineering, Liaocheng University, Liaocheng, Shandong 252059, P. R. China

<sup>b</sup> Department of Chemistry, Shandong Normal University, Jinan 250014, P. R. China

### 1. <sup>1</sup>H NMR spectral data, elemental analysis dates and IR spectrogram of 12-3(OH)-12(2Cl)

<sup>1</sup>H NMR:  $\delta$ H (400MHz, CDCl<sub>3</sub>), 0.88(t, 6H, 2CH<sub>3</sub>CH<sub>2</sub>), 1.20~1.45(m, 36H, 2CH<sub>3</sub>(CH<sub>2</sub>)<sub>9</sub>), 1.80(m, 4H, 2CH<sub>3</sub>(CH<sub>2</sub>)<sub>9</sub>CH<sub>2</sub>), 2.16(1H, OH), 3.39~3.42(s, 12H, 4NCH<sub>3</sub>), 3.52(t, 4H, 2CH<sub>3</sub>(CH<sub>2</sub>)<sub>10</sub>CH<sub>2</sub>), 3.67(d, 4H, 2CHCH<sub>2</sub>), 5.19(m, 1H, CHCH<sub>2</sub>)

Elemental analysis: measured value (theoretical value) (%): C 66.31(67.03), H 12.10(12.25), N 4.85(5.05), Cl, 12.08(12.25).

#### IR spectrogram:

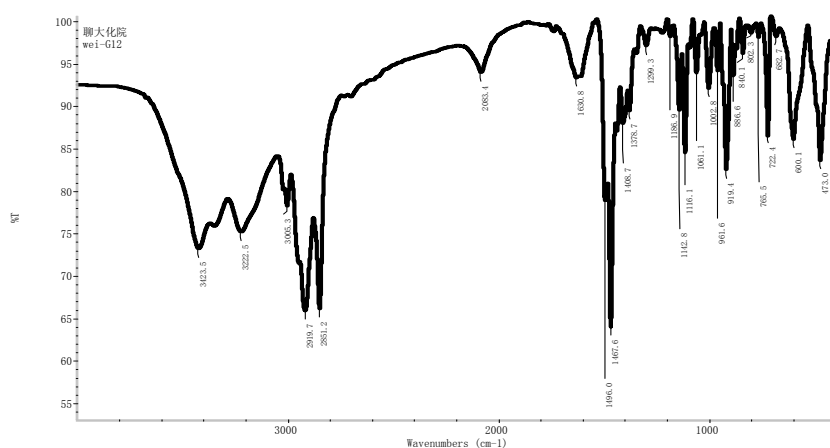

Fig.1

<sup>\*</sup> Shandong Provincial Key Laboratory of Chemical Energy Storage and Novel Cell Technology, Liaocheng University, Liaocheng, Shandong 252059, P. R. China

E-mail: weixilian@126.com; Fax: +86-635-8239196; Tel: +86-635-8230613

<sup>b</sup> Department of Chemistry, Shandong Normal University, Jinan, 250014, P.R. China.

E-mail: zhongniw@hotmail.com

在  $3222.5\text{cm}^{-1}$ (-OH),  $2919.7\text{cm}^{-1}$ (-CH<sub>3</sub>),  $2851\text{cm}^{-1}$ (-CH<sub>2</sub>),  $1467.6\text{cm}^{-1}$ (C - N<sup>+</sup> - C),  
 $3423\text{cm}^{-1}$ (H<sub>2</sub>O).

2. Photograph of 12-3(OH)-12(2Cl) 42 wt% taken at 25°C with crossed polarizer

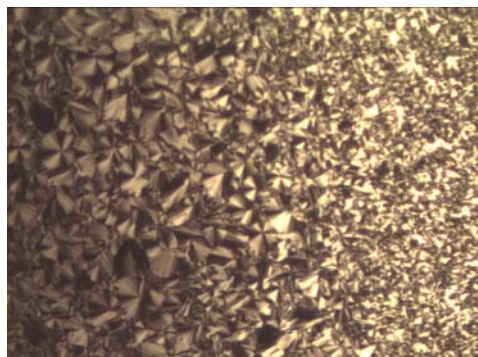

Fig.2

3. Curves of apparent viscosity ( $\eta$ ) versus shear rate ( $\dot{\gamma}$ ) for aqueous solutions of  
12-3(OH)-12(2Cl) at different concentrations and temperatures.

■, 10wt%; ●, 15wt%; ▲, 20wt%; ▼, 25wt%; ◆, 30wt%; ◆, 35wt%; ▶, 40wt%

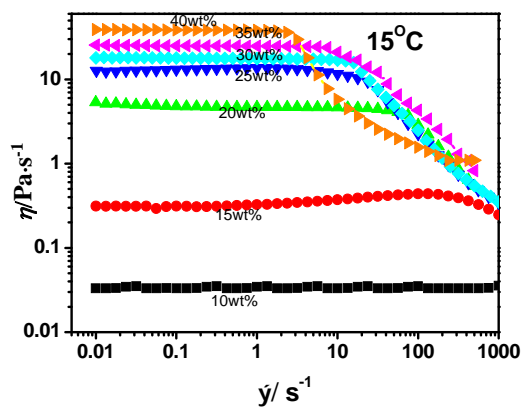

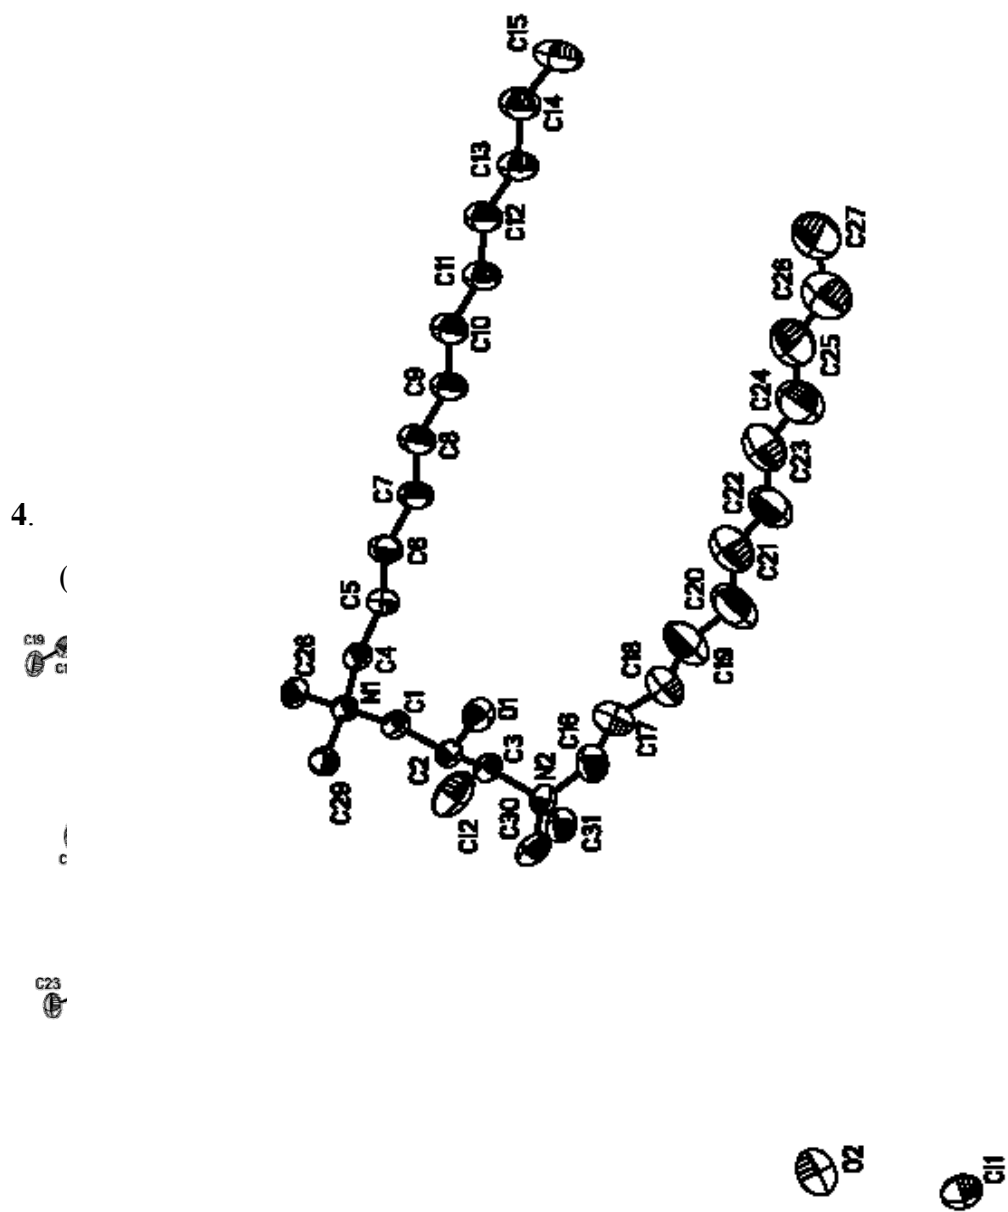

(B) The molecular structures of the  $R_{14-16}$ -3(OH)-  $R_{14-16}$  (2Br)

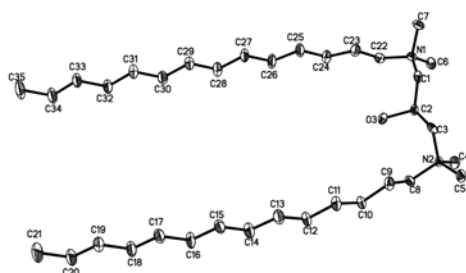

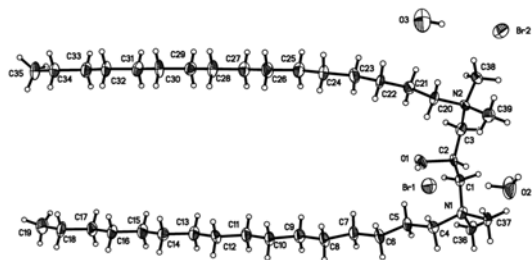

**Fig.5**

Explain: We have not made the crystal of 12-3(OH)- 12(2Br) So far, taking into account the similarity of molecular structures of  $R_{14-16}$ -3(OH)-  $R_{14-16}$  (2Br) and  $R_{12-16}$ -3(OH)-  $R_{12-16}$  (2Cl), using the structures of 14-3(OH)- 14 (2Br) and 14-3(OH)- 14 (2Cl) as a compare.

(C) Hydrogen bonds between the pendant hydroxyl group and halide ions and crystallization water molecules: (A) 12-3(OH)-12(2Cl), (B) 14-3(OH)-14(2Br)

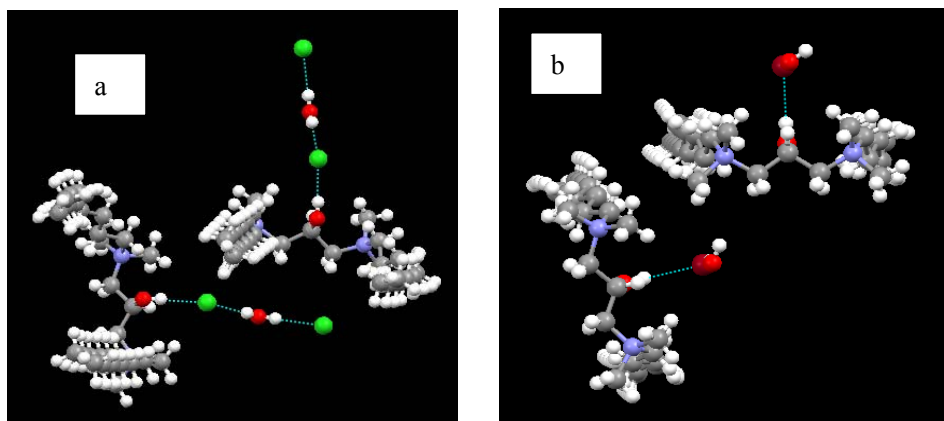

**Fig. 6**

5. Zero-shear apparent viscosity of 12-3(OH)-12(2Cl) as a function of concentration at different temperatures. (a) 15 °C; (b) 20 °C ; (c) 25 °C

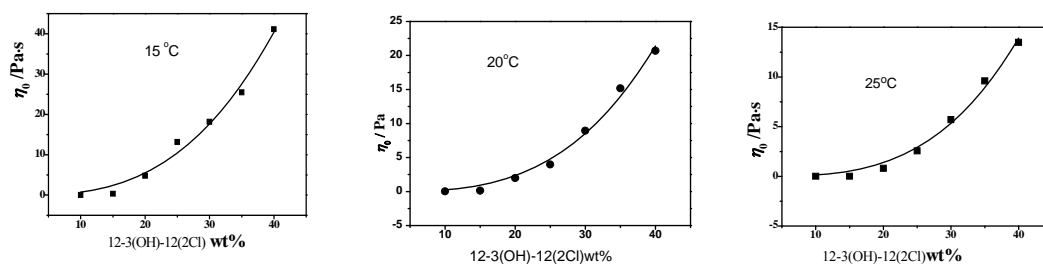

**Fig.7**

6. The Storage modulus (closed symbol) and loss modulus (open symbol) as a

function of angular frequency for solutions with different 12-3(OH)-12(2Cl)wt% which are indicated in the figures (a) at 20 °C and the corresponding Cole–Cole plots (b).

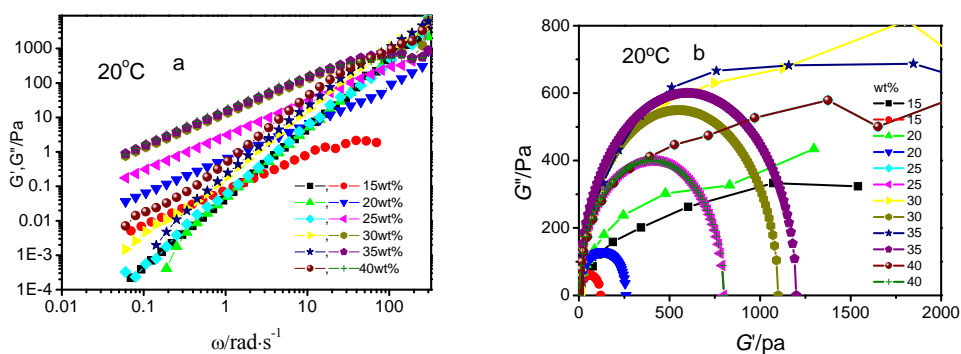

**Fig.8**

The Storage modulus (closed symbol) and loss modulus (open symbol) as a function of angular frequency for solutions with different 12-3(OH)-12(2Cl)wt% which are indicated in the figures (a) at 25 °C and the corresponding Cole–Cole plots (b).

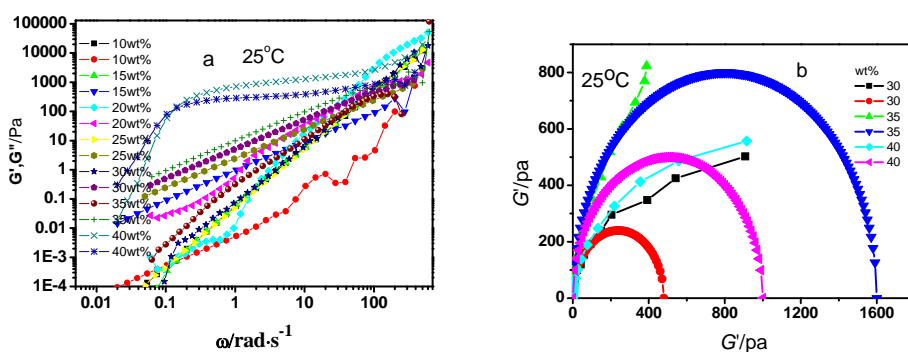

**Fig. 9**

7. Shear-rate dependence ( $\dot{\gamma}$ ) of steady-shear viscosity ( $\eta$ , closed symbol) and frequency dependence ( $\omega$ ) of absolute value of complex viscosity ( $|\eta^*|$ , open symbol) for 12-3(OH)-12(2Cl) solution with different wt% which are indicated in the figures.

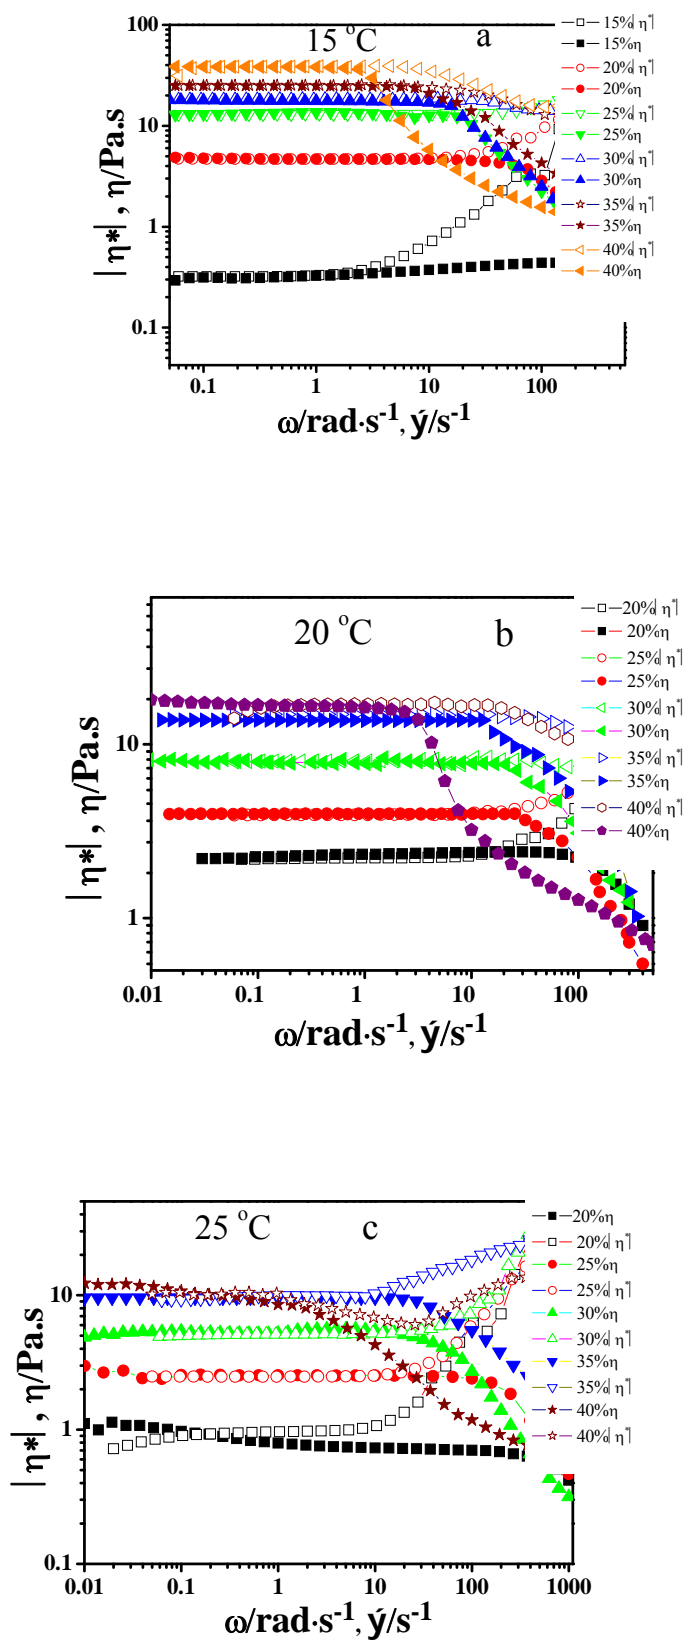

Fig. 10

8. Schematic diagrams of the hydrogen bonds between micelles and the network structure

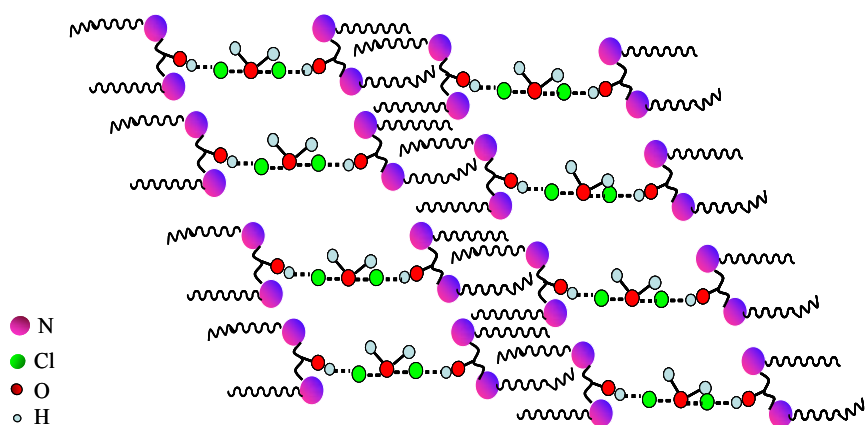

Fig. 11

9. Plot of shear stress ( $\sigma$ ) vs. shear rate ( $\dot{\gamma}$ ) for different contents of 12-3(OH)-12(2Cl)(wt%) solutions at 15 °C(a), 20 °C (b) and 25 °C(c), respectively

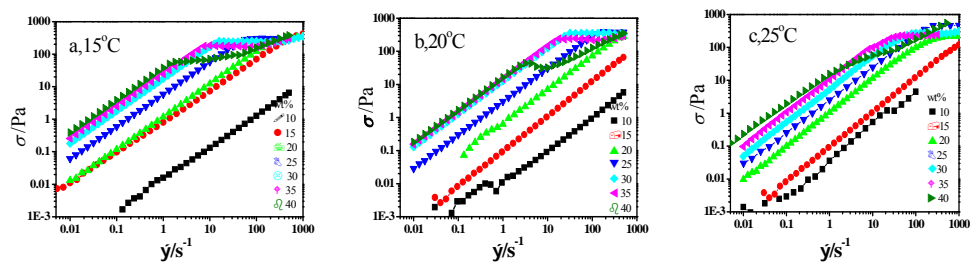

Fig.12

10. Photograph of the sample containing 30wt% 12-3(OH)-12(2Cl) at the end of the experiment

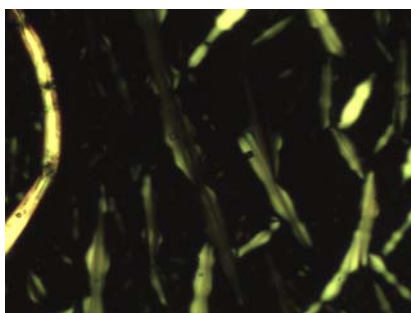

Fig. 13

## 11. Tables

**Table 1** Crystallographic parameters of R<sub>12-16</sub>-3(OH)- R<sub>12-16</sub>- (2Cl) and R<sub>14-16</sub>--3(OH)- R<sub>14-16</sub>- (2Br)

|                                                          |                                                                               |                                                                               |                                                                               |                                                          |                                                                               |                                                                               |
|----------------------------------------------------------|-------------------------------------------------------------------------------|-------------------------------------------------------------------------------|-------------------------------------------------------------------------------|----------------------------------------------------------|-------------------------------------------------------------------------------|-------------------------------------------------------------------------------|
| Formula                                                  | C <sub>31</sub> H <sub>70</sub> Cl <sub>2</sub> N <sub>2</sub> O <sub>2</sub> | C <sub>35</sub> H <sub>78</sub> Cl <sub>2</sub> N <sub>2</sub> O <sub>2</sub> | C <sub>39</sub> H <sub>86</sub> Cl <sub>2</sub> N <sub>2</sub> O <sub>2</sub> | Formula                                                  | C <sub>35</sub> H <sub>78</sub> Br <sub>2</sub> N <sub>2</sub> O <sub>3</sub> | C <sub>39</sub> H <sub>88</sub> Br <sub>2</sub> N <sub>2</sub> O <sub>3</sub> |
| Formula wt                                               | 573.79                                                                        | 629.89                                                                        | 686.00                                                                        | Formula wt                                               | 736.80                                                                        | 792.93                                                                        |
| Cryst syst                                               | Monoclinic                                                                    | Monoclinic                                                                    | Monoclinic                                                                    | Cryst syst                                               | Orthorhombic                                                                  | Orthorhombic                                                                  |
| Space group                                              | <i>P</i> 2 <sub>1</sub> / <i>c</i>                                            | <i>P</i> 2 <sub>1</sub> / <i>c</i>                                            | <i>P</i> 2 <sub>1</sub> / <i>c</i>                                            | Space group                                              | Pbca                                                                          | Pbca                                                                          |
| <i>a</i> . Å                                             | 22.999(3)                                                                     | 25.402(3)                                                                     | 27.977(3)                                                                     | <i>a</i> . Å                                             | 8.8000(9)                                                                     | 8.7630(7)                                                                     |
| <i>b</i> . Å                                             | 9.6368(12)                                                                    | 9.5648(8)                                                                     | 9.5824(9)                                                                     | <i>b</i> . Å                                             | 16.8741(18)                                                                   | 16.8491(15)                                                                   |
| <i>c</i> . Å                                             | 17.2702(16)                                                                   | 17.1691(15)                                                                   | 17.1634(15)                                                                   | <i>c</i> . Å                                             | 56.210(4)                                                                     | 61.244(4) A                                                                   |
| $\alpha$ . °                                             | 90.00                                                                         | 90.00                                                                         | 90.00                                                                         | $\alpha$ . °                                             | 90.00                                                                         | 90.00                                                                         |
| $\beta$ . °                                              | 100.665(2)                                                                    | 101.553(2)                                                                    | 102.438(2)                                                                    | $\beta$ . °                                              | 90.00                                                                         | 90.00                                                                         |
| $\gamma$ . °                                             | 90.00                                                                         | 90.00                                                                         | 90.00                                                                         | $\gamma$ . °                                             | 90.00                                                                         | 90.00                                                                         |
| <i>V</i> . Å <sup>3</sup>                                | 3761.5(7)                                                                     | 4087.0(6)                                                                     | 4493.3(7)                                                                     | <i>V</i> . Å <sup>3</sup>                                | 8346.8(13)                                                                    | 9042.6(12)                                                                    |
| <i>Z</i>                                                 | 4                                                                             | 4                                                                             | 4                                                                             | <i>Z</i>                                                 | 8                                                                             | 8                                                                             |
| <i>D</i> <sub>calc.</sub> (g cm <sup>-3</sup> )          | 1.013                                                                         | 1.024                                                                         | 1.014                                                                         | <i>D</i> <sub>calc.</sub> (g cm <sup>-3</sup> )          | 1.166                                                                         | 1.165                                                                         |
| <i>F</i> (000)                                           | 1280                                                                          | 1408                                                                          | 1536                                                                          | <i>F</i> (000)                                           | 3152                                                                          | 3440                                                                          |
| M(Mo <i>K</i> α) (mm <sup>-1</sup> )                     | 0.198                                                                         | 0.187                                                                         | 0.175                                                                         | M(Mo <i>K</i> α) (mm <sup>-1</sup> )                     | 1.973                                                                         | 1.826                                                                         |
| Theta range                                              | 1.80-25.02                                                                    | 1.64-25.02                                                                    | 1.49-25.02                                                                    | Theta range                                              | 2.43 -25.02                                                                   | 2.42 - 25.02                                                                  |
| Reflections measured                                     | 18430                                                                         | 20837                                                                         | 21982                                                                         | Reflections measured                                     | 39506                                                                         | 42522                                                                         |
| Unique reflections                                       | 6635                                                                          | 7151                                                                          | 7853                                                                          | Unique reflections                                       | 7353                                                                          | 7976                                                                          |
| <i>R</i> (int)                                           | 0.0592                                                                        | 0.1463                                                                        | 0.1112                                                                        | <i>R</i> (int)                                           | 0.1324                                                                        | 0.1451                                                                        |
| GOF                                                      | 1.000                                                                         | 0.999                                                                         | 0.999                                                                         | GOF                                                      | 1.169                                                                         | 1.078                                                                         |
| Final <i>R</i> <sub>1</sub> [ <i>I</i> >2σ( <i>I</i> )]  | 0.0591                                                                        | 0.0758                                                                        | 0.0838                                                                        | Final <i>R</i> <sub>1</sub> [ <i>I</i> >2σ( <i>I</i> )]  | 0.1202                                                                        | 0.1405                                                                        |
| Final <i>wR</i> <sub>2</sub> [ <i>I</i> >2σ( <i>I</i> )] | 0.1326                                                                        | 0.1002                                                                        | 0.1673                                                                        | Final <i>wR</i> <sub>2</sub> [ <i>I</i> >2σ( <i>I</i> )] | 0.2151                                                                        | 0.2799                                                                        |



**Table 2** Flow activation energy of 12-3(OH)-12(2Cl) at different concentrations

| 12-3(OH)-12(2Cl)wt%                 | 15     | 20    | 25    | 30    | 35    | 40    |
|-------------------------------------|--------|-------|-------|-------|-------|-------|
| $E_a/\text{kJ}\cdot\text{mol}^{-1}$ | 100.05 | 58.55 | 54.26 | 38.24 | 32.01 | 36.74 |

**Table 3**  $\omega^c$  data of 12-3(OH)-12(2Cl) at different temperatures

| 12-3(OH)-12(2Cl) wt% | 15    | 20     | 25     | 30     | 35    | 40    |
|----------------------|-------|--------|--------|--------|-------|-------|
| 15°C                 | 1.767 | 14.017 | 17.55  | 16.05  | 7.811 | 2.476 |
| 20°C                 | 1.232 | 16.328 | 24.89  | 21.02  | 12.69 | 2.484 |
| 25°C                 |       | 0.269  | 18.263 | 24.166 | 9.841 | 1.928 |
